# Supplementary material for: Highly compressible hydrogel sensors with synergistic long-lasting moisture, extreme temperature tolerance and strain-sensitivity properties
Source: Royal Society of Chemistry journal article supplement (doi:10.1039/d0qm00566e), 2020-01-01
Supplement: d0qm00566e2.pdf [file d0qm00566e2.pdf]

# Highly Compressible Hydrogel Sensors with Synergistic Long-lasting Moisture, Extreme Temperature Tolerance and Strain-sensitivity Property

Zhenzhen Liu, ‡<sup>a, b</sup> Jing Liu, ‡<sup>a, b</sup> Junmei Zhang,<sup>a, b</sup> Bixia Zheng,<sup>a, b</sup> Xinle Ren,<sup>a, b</sup>  
YanJun Long,<sup>a, b</sup> Liming Fang,<sup>c</sup> Rongxian Ou,<sup>\*a, b</sup> Tao Liu,<sup>\*a, b</sup> Qingwen Wang<sup>a, b</sup>

- a. Key Laboratory for Biobased Materials and Energy of Ministry of Education, College of Materials and Energy, South China Agricultural University, 483 Wushan Road, Guangzhou 510642, China
- b. Guangdong Laboratory for Lingnan Modern Agricultural Science and Technology, 483 Wushan Road, Guangzhou 510642, China
- c. Department of Polymer Science and Engineering, School of Materials Science and Engineering, South China University of Technology, Guangzhou 510641, China

\*Corresponding author

E-mail address: rongxian\_ou@scau.edu.cn, liutao@scau.edu.cn

‡Theses authors contributed equally to this work.

**Table S1.** DFT calculation results of the interaction energy of different system

| Model                             | Interaction energy (kcal/mol) |
|-----------------------------------|-------------------------------|
| H <sub>2</sub> O-H <sub>2</sub> O | -6.35 <sup>[1]</sup>          |
| glycerin-H <sub>2</sub> O         | -7.06 <sup>[1]</sup>          |
| glycerin-glycerin                 | -5.97 <sup>[1]</sup>          |
| TA-H <sub>2</sub> O               | -18.81                        |
| TA-glycerin/H <sub>2</sub> O      | -22.18                        |
| PVA-glycerin/H <sub>2</sub> O     | -42.86                        |
| PVA-TA                            | -41.59                        |

**Table S2.** The compressive mechanical properties of hydrogels.

| Sample Code | Fracture Stress<br>[MPa] | Fracture Stain<br>[%] | E<br>[kPa] |
|-------------|--------------------------|-----------------------|------------|
| PVA-W       | 0.16                     | 82.5                  | 6.69       |
| PT0-GW      | 0.37                     | 84.9                  | 9.07       |
| PT25-GW     | 0.69                     | 81.5                  | 9.37       |
| PT50-GW     | 1.15                     | 82.8                  | 9.58       |
| PT100-GW    | 2.32                     | 86.8                  | 9.99       |
| PT200-GW    | 9.85                     | 94.2                  | 12.37      |

**Table S3.** The compressive mechanical properties of PVA-W and PT100-GW hydrogels at different temperatures.

| Temperature<br>[°C] | Sample Code | Fracture Stress<br>[MPa] | Fracture Stain<br>[%] |
|---------------------|-------------|--------------------------|-----------------------|
| -20                 | PT100-GW    | 7.89                     | 79.65                 |
|                     | PVA-W       | --                       | --                    |
| -10                 | PT100-GW    | 4.03                     | 76.74                 |
|                     | PVA-W       | --                       | --                    |
| 0                   | PT100-GW    | 2.4                      | 75.3                  |
|                     | PVA-W       | 1.42                     | 80.71                 |
| RT                  | PT100-GW    | 2.18                     | 87.28                 |

|    |          |       |       |
|----|----------|-------|-------|
|    | PVA-W    | 0.21  | 74.89 |
| 40 | PT100-GW | 2.71  | 83.59 |
|    | PVA-W    | 0.12  | 61.38 |
| 50 | PT100-GW | 0.67  | 76.47 |
|    | PVA-W    | 0.03  | 61.04 |
| 60 | PT100-GW | 0.41  | 61.99 |
|    | PVA-W    | 0.004 | 25.12 |

**Table S4.** The gauge factor of PT100-GW hydrogel strain sensor at different temperatures in compressive strain test.

| Gauge Factor<br>Temperature | Compressive Strain |      |      |      |      |      |      |      |
|-----------------------------|--------------------|------|------|------|------|------|------|------|
|                             | 10%                | 20%  | 30%  | 40%  | 50%  | 60%  | 70%  | 80%  |
| RT                          | 0.28               | 0.32 | 0.37 | 0.36 | 0.42 | 0.46 | 0.48 | 0.52 |
| -20°C                       | 0.11               | 0.23 | 0.32 | 0.38 | 0.40 | 0.44 | 0.50 | 0.54 |
| 60°C                        | 0.61               | 0.47 | 0.51 | 0.64 | 0.93 | --   | --   | --   |

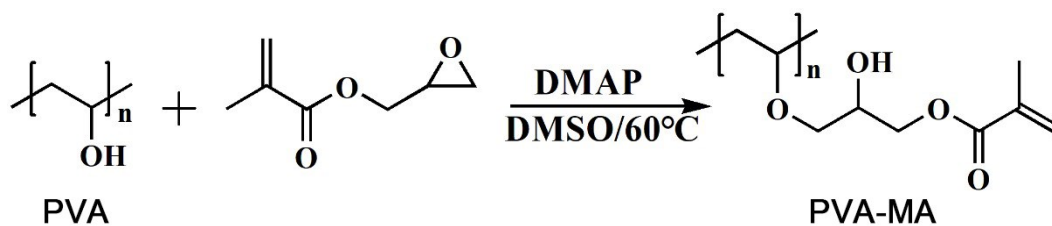

**Figure S1.** The synthesis route of PVA-MA.

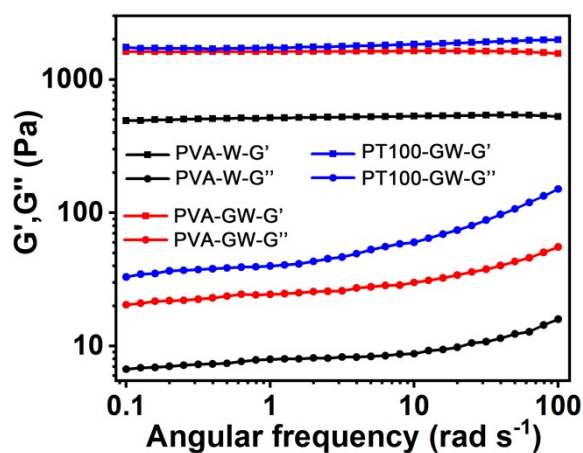

**Figure S2.** The storage modulus ( $G'$ ) and loss modulus ( $G''$ ) of PVA-W, PVA-GW and PT100-GW hydrogels.

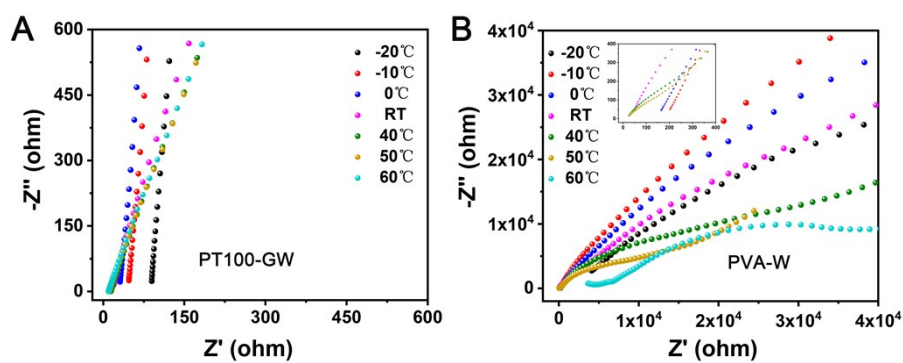

**Figure S3.** The Nyquist plot of PT100-GW (A) and PVA-W (B) hydrogel electrolytes under different temperatures.

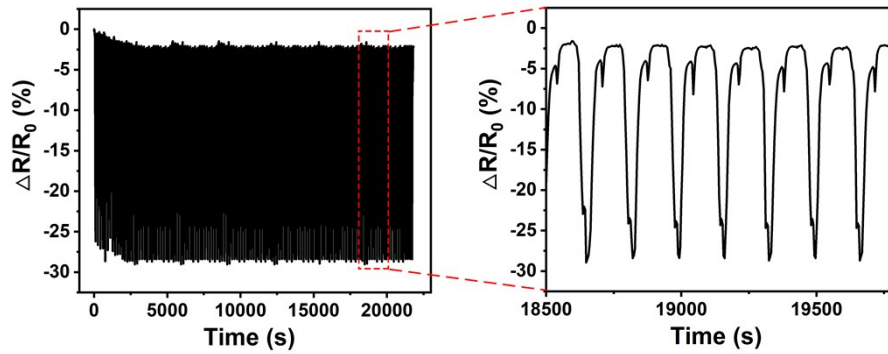

**Figure S4.** The durable strain-sensitive test under a 50% compressive strain for 150 loading/unloading cycles.

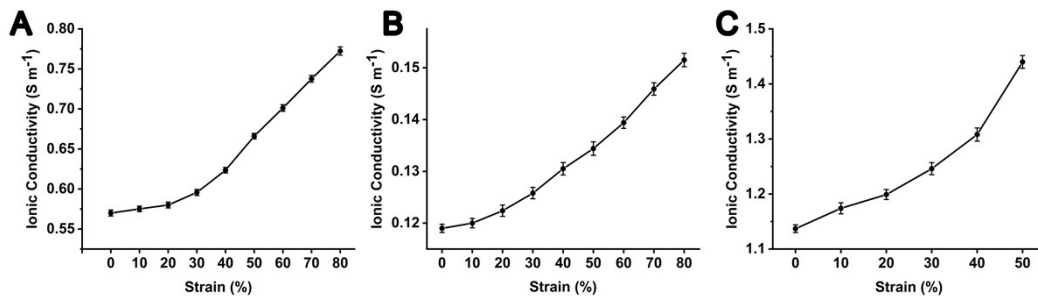

**Figure S5.** The ionic conductivity of PT100-GW hydrogel strain sensor at RT (A), -20°C (B), and 60°C (C) in the compressive test.

## References

- [1] L. Han, K. Liu, M. Wang, K. Wang, L. Fang, H. Chen, J. Zhou, X. Lu, Mussel-Inspired Adhesive and Conductive Hydrogel with Long-Lasting Moisture and Extreme Temperature Tolerance, *Adv. Funct. Mater.* 28 (2018) 1704195.
